# Supplementary material
Source: publisher figshare collection journal article supplement (https://wiley.figshare.com/articles/dataset/_/3559023)
Supplement: Supplementary file 1 [file 1 › appendix-E.htm]

Ecological Archives E095-086-A5


*Ecological Archives* E095-086-A5

James M. Pringle, James E. Byers, Paula Pappalardo, John P. Wares, Dustin Marshall. 2014. Circulation constrains the evolution of larval development modes and life histories in the coastal ocean. *Ecology* 95:1022–1032. http://dx.doi.org/10.1890/13-0970.1

Appendix E. Variation of larval growth *g* with temperature.

> View / download PDF.


---

[Back to E095-086]
