# Supplementary material
Source: publisher figshare collection journal article supplement (https://wiley.figshare.com/articles/dataset/_/3559023)
Supplement: Supplementary file 1 [file 1 › appendix-E.pdf]

# Appendices to: Circulation constrains the evolution of larval development modes and life histories in the coastal ocean

James M. Pringle, James E. Byers, Paula Pappalardo, John P. Wares, Dustin Marshall

## **Appendix E: Variation of larval growth $g$ with temperature: O'Connor et al. (2007)**

(hereafter OC07) find a universal relation for variation of planktonic duration  $T_{PLD}$  within a species:

$$T_{PLD} = \exp(\beta_0)(T/T_c)^{(-1.40-0.27\ln(T/T_c))} \quad E.1$$

where  $T$  is the temperature and  $T_c$  is a reference temperature of 15°C.  $\beta_0$  is a species dependent parameter. (E1) is set equal to  $T_{PLD}$  from (4) to give:

$$g^{-1} \ln(S_{crit}/S_{larvae}) = \exp(\beta_0)(T/T_c)^{(-1.40-0.27\ln(T/T_c))}$$

We then assume that variation in  $\exp(\beta_0)$  largely represents the variation in maternal provisioning of the larvae  $\ln(S_{crit}/S_{larvae})$ . This is supported by OC07's finding that  $\beta_0$  is significantly smaller for lecithotrophic species (i.e. they have a smaller  $T_{PLD}$  for a given temperature). Under this assumption, the growth scales, to within some unknown multiplicative constant, as

$$g \propto (T/T_c)^{(1.40+0.27\ln(T/T_c))} \quad E.2$$

This relation conflates with-species variation of  $T_{PLD}$  with temperature with between species variation with temperature. This is likely to over-estimate the variation of  $g$  with temperature, for Hoegh-Guldberg & Pearse (1995) found that some, but not all, of the variation in growth of larvae with temperature between species which live in habitats of different temperatures can be physiologically compensated for. However, they found that this compensation was limited and incomplete.

#### LITERATURE CITED

- Hoegh-Guldberg, O., and J. S. Pearse. 1995. Temperature, food availability, and the development of marine invertebrate larvae. *American Zoologist* 35:415–425.
- O'Connor, M. I., J. F. Bruno, S. D. Gaines, B. S. Halpern, S. E. Lester, B. P. Kinlan, and J. M. Weiss. 2007. Temperature control of larval dispersal and the implications for marine ecology, evolution, and conservation. *Proceedings of the National Academy of Sciences of the United States of America* 104:1266–1271.
